# Supplementary material for: BacPROTACs mediate targeted protein degradation in bacteria
Source: bioRxiv or medRxiv preprint supplement (doi:10.1101/2021.06.09.447781), 2021-06-10
Supplement: Supplementary file [file media-1.pdf]

## SUPPLEMENTARY FIGURES

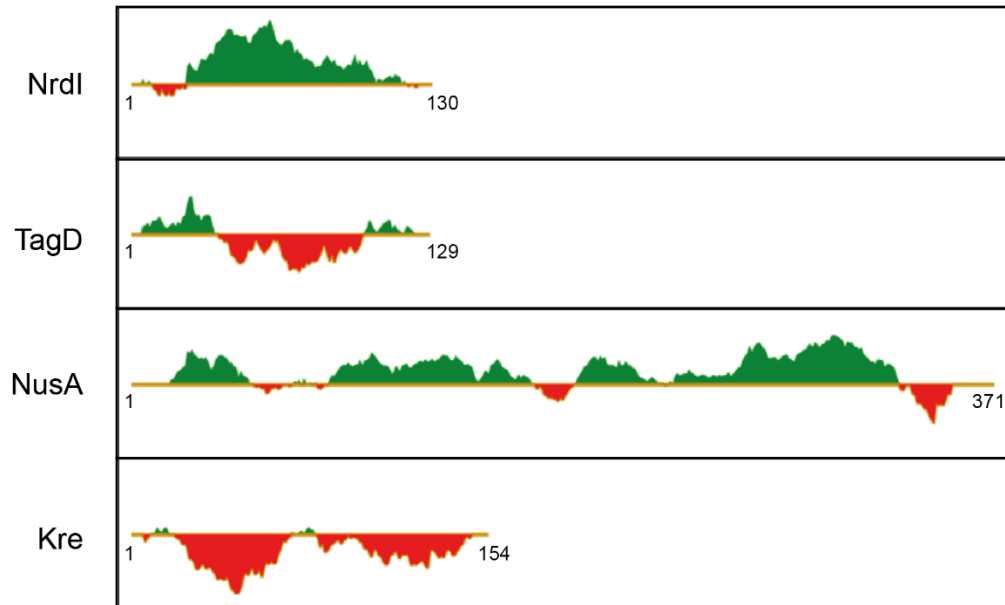

**Figure S1. Predicted foldedness of selected model proteins.**

- 5 FoldIndex (Prilusky et al., 2005) analysis of *B. subtilis* proteins used in mSA-fusion constructs. Structurally ordered sequences (green) and disordered regions (red) are highlighted. The selected proteins include: NrdI (a flavodoxin-like protein component of ribonucleoside reductases) (Cotruvo and Stubbe, 2010), TagD (glycerol-3-phosphate cytidyltransferase involved in teichoic acid synthesis) (Park et al., 1993),
- 10 NusA (transcription factor involved in pausing/termination) (Gusarov and Nudler, 2001) and Kre (also known as YkyB, a regulator of the competence transcription factor ComK) (Gamba et al., 2015). PDB structures are available for *B. subtilis* NrdI bound to riboflavin monophosphate (PDB: 1RLJ); *B. subtilis* TagD dimer bound to cytidine-5'-triphosphate (PDB: 1COZ); *Thermotoga maritima* NusA, which has 51% identity to
- 15 *B. subtilis* NusA (PDB: 1HH2).

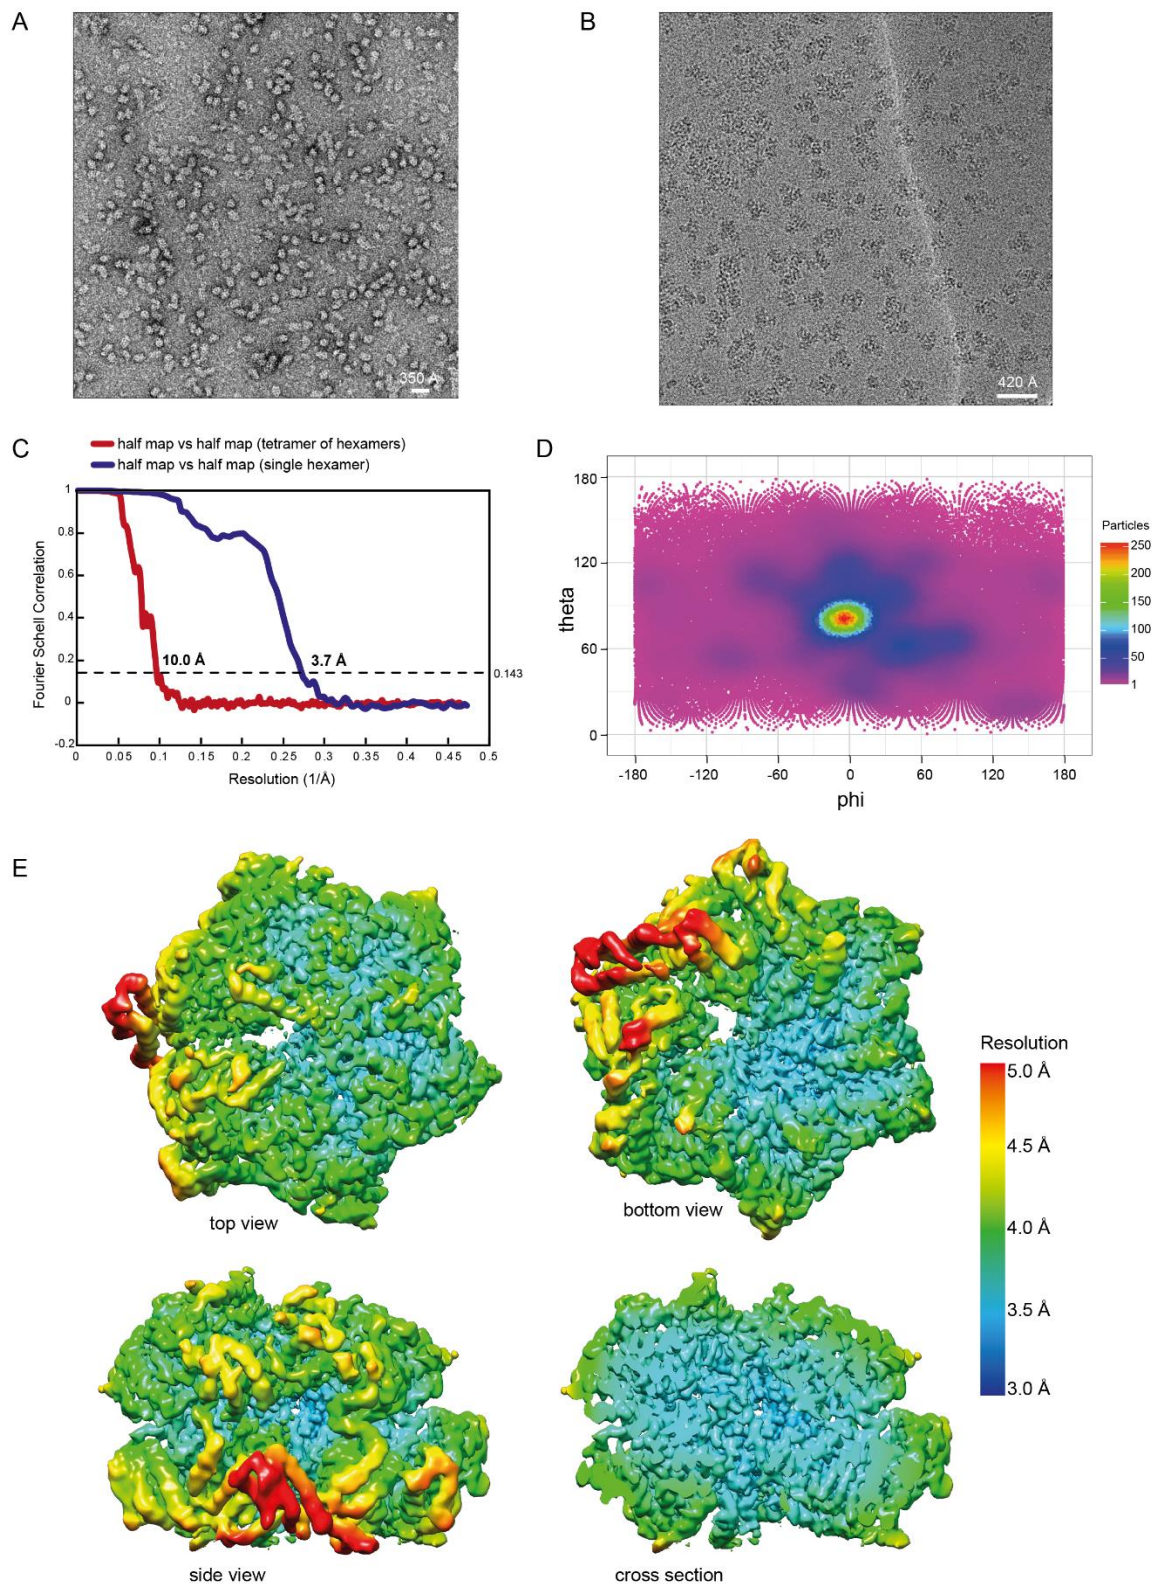

**Figure S2. EM analysis of *B. subtilis* ClpC<sub>DWB</sub>.**

(A) Negative stain EM analysis of *B. subtilis* ClpC<sub>DWB</sub> in the absence of BacPROTAC-1: representative micrograph from the 1,004 collected (scale bar = 350 Å). (B) Cryo-EM analysis of *B. subtilis* ClpC<sub>DWB</sub> in the presence of BacPROTAC-1: a representative

micrograph from the 4,455 collected (scale bar = 420 Å). **(C)** FSC curves of the final maps obtained by cryo-EM analysis, showing a resolution of 10 Å for the tetramer of hexamers map and 3.7 Å for the single hexamer map. **(D)** Angular distribution of the particles used to reconstruct the single hexamer map. **(E)** Local resolution map for the single hexamer in different orientations.

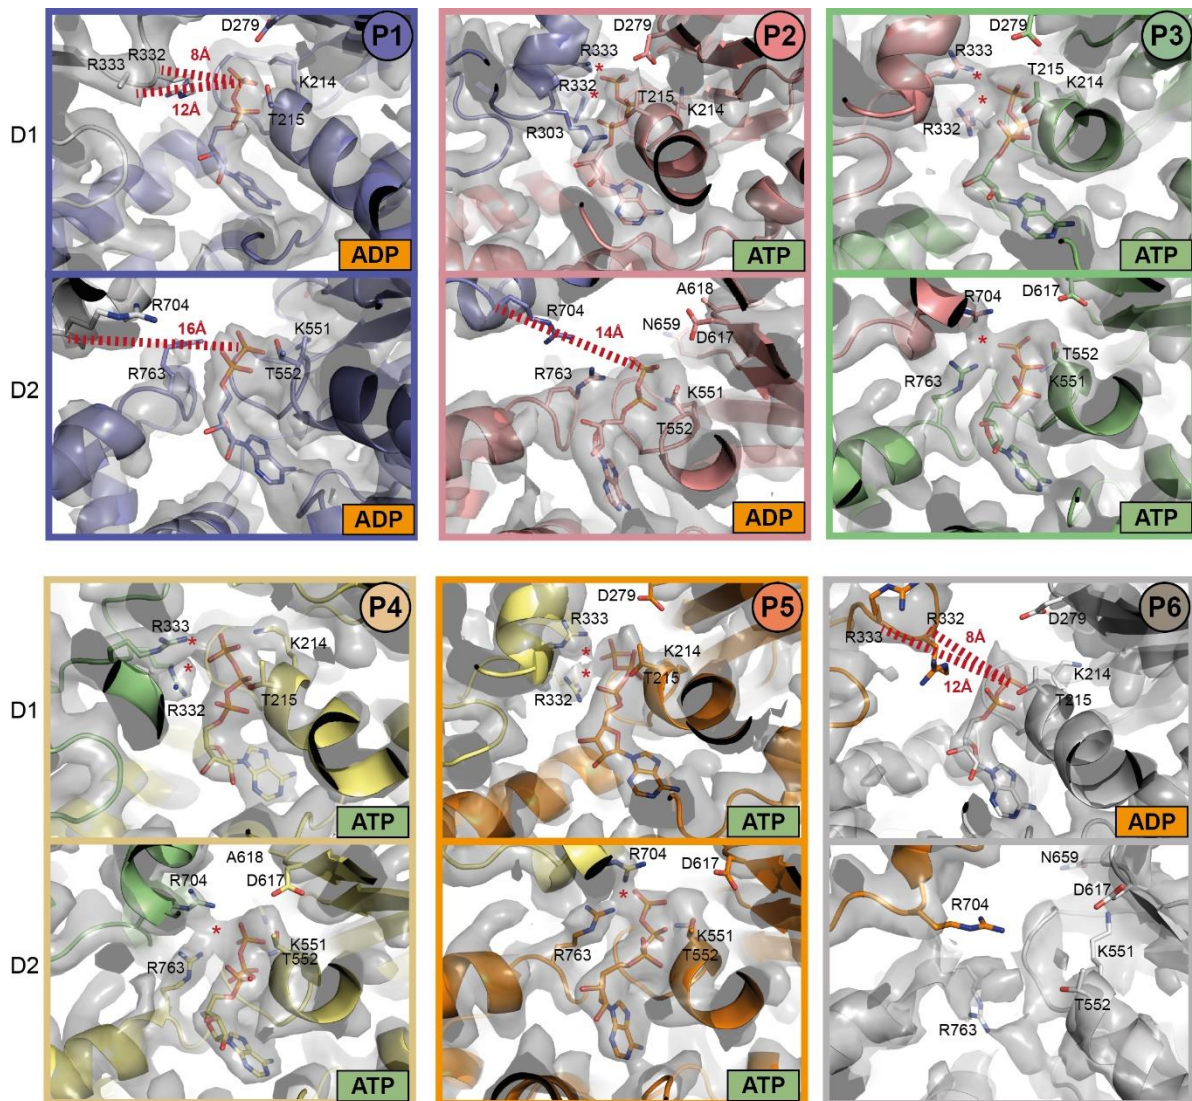

30 **Figure S3. Nucleotide binding sites of the six ClpC<sub>DWB</sub> protomers.**

The different panels show the modelled nucleotide in each active site pocket and some of the crucial residues involved in ATP hydrolysis and ATP/ADP interaction. Contacts between ATP  $\gamma$ -phosphate and Arg fingers in D1 (R332-R333) and D2 (R704) are indicated (\*) for the ATP-bound sites, while distances between Arg fingers C $\alpha$  and ADP  $\beta$ -phosphate are shown for ADP-bound sites. The cryo-EM map is represented as grey surface around the modelled protein structure.

35

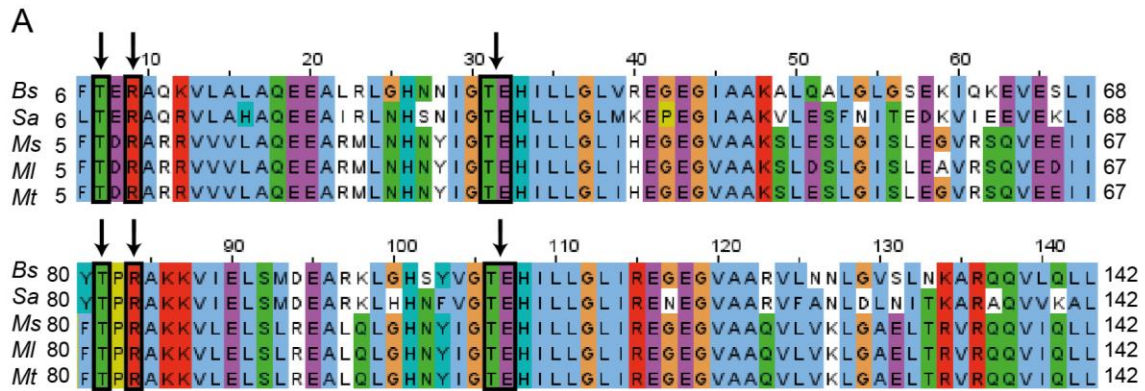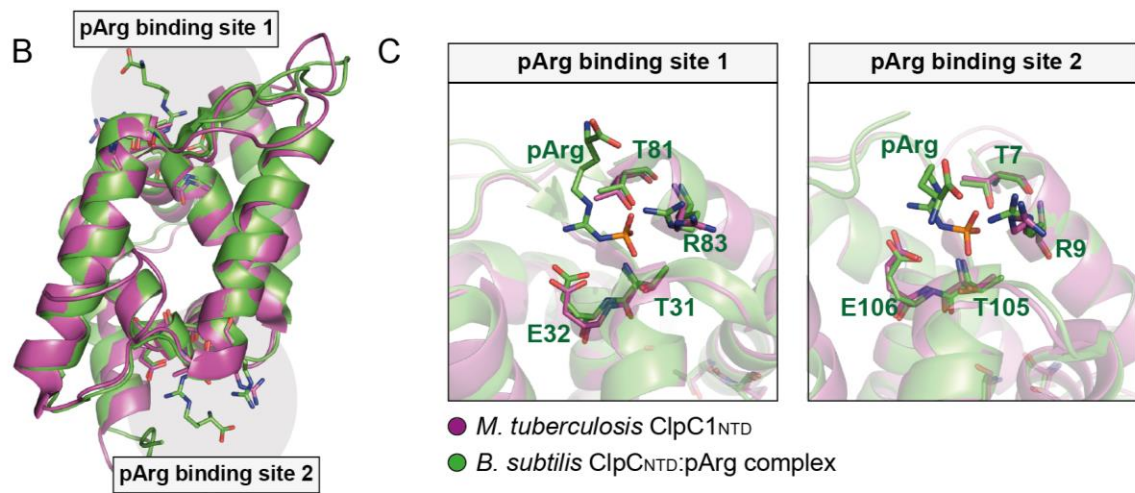

**Figure S4. Conservation of pArg binding sites in Gram-positive bacteria and mycobacteria.**

40

(A) Sequence alignment of ClpC<sub>NTD</sub>s from different species (*B. subtilis*, *S. aureus*, *M. smegmatis*, *M. leprae*, *M. tuberculosis*). Residues interacting with pArg are circled in black and marked by an arrow. (B) Structure of pArg-bound *B. subtilis* ClpC<sub>NTD</sub> (colored green, PDB: 5HBN) superposed with *M. tuberculosis* ClpC1<sub>NTD</sub> (colored magenta, PDB: 3WDB). (C) Zoomed view of the two pArg binding sites shows that crucial residues interacting with the phospho-guanidino group are conserved in *M. tuberculosis*.

45

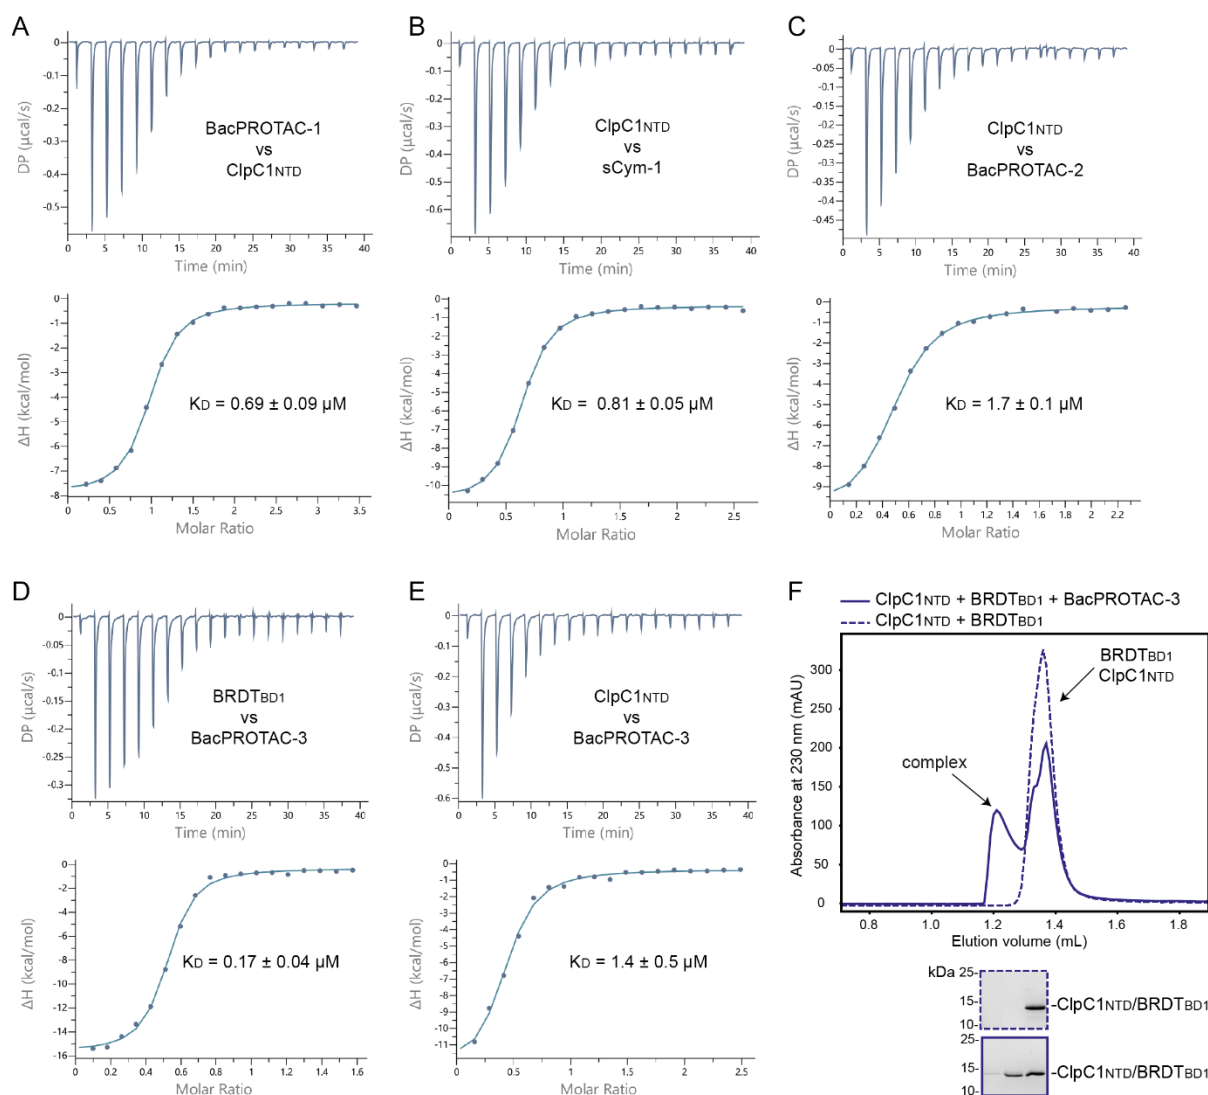

50 **Figure S5. Characterization of compounds and BacPROTACs binding ClpC1<sub>NTD</sub>.**

(A) Representative ITC titration of BacPROTAC-1 (400  $\mu$ M loaded in the syringe) against ClpC1<sub>NTD</sub> (22  $\mu$ M loaded in the cell); reported  $K_D$  value represents the average  $\pm$  standard deviation of three independent measurements. (B) Representative ITC titration of ClpC1<sub>NTD</sub> (406  $\mu$ M loaded in the syringe) against sCym-1 (30  $\mu$ M loaded in the cell), reported  $K_D$  value represents the average  $\pm$  standard deviation of three independent measurements. (C) Representative ITC titration of ClpC1<sub>NTD</sub> (356  $\mu$ M loaded in the syringe) against BacPROTAC-2 (30  $\mu$ M loaded in the cell), reported  $K_D$  value represents the average  $\pm$  standard deviation of two independent measurements. (D) Representative ITC titration of BRDT<sub>BD1</sub> (124  $\mu$ M loaded in the syringe) against BacPROTAC-3 (15  $\mu$ M loaded in the cell); reported  $K_D$  value represents the average  $\pm$  standard deviation of three independent measurements. (E) Representative ITC titration of ClpC1<sub>NTD</sub> (392  $\mu$ M loaded in the syringe) against BacPROTAC-3 (30  $\mu$ M

loaded in the cell); reported  $K_D$  value represents the average  $\pm$  standard deviation of five independent measurements. (F) SEC analysis of a stoichiometric BRDT<sub>BD1</sub>:ClpC1<sub>NTD</sub> mixture in the presence (solid line) or absence (dashed line) of BacPROTAC-3. The two proteins elute at the same volume also in the absence of BacPROTAC because of their similar size, however BacPROTAC-3 addition mediates formation of an additional peak compatible with the elution volume expected for the BRDT<sub>BD1</sub>:BacPROTAC-3:ClpC1<sub>NTD</sub> ternary complex. Coomassie stained SDS-PAGE gel of the collected peak fractions is shown. BRDT<sub>BD1</sub> and ClpC1<sub>NTD</sub> have identical electrophoretic mobility and are thus not distinguishable on the Coomassie stained gel.

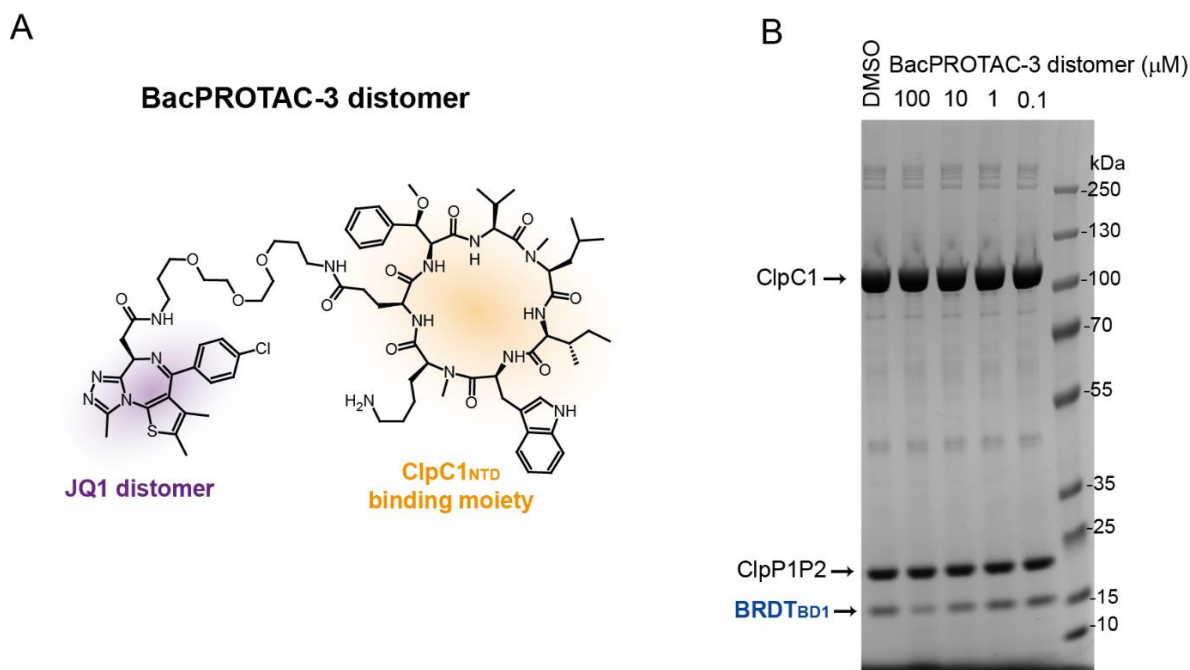

75 **Figure S6. BacPROTAC-3-induced degradation is stereospecific.**

JQ1 binding to BRDT<sub>BD1</sub> is stereo-specific (Filippakopoulos et al., 2010). Only the JQ1-(S) enantiomer is active (eutomer), while the JQ1-(R) enantiomer binds with an approximately 60-fold lower affinity (distomer). (A) Chemical structure of the BacPROTAC-3 distomer, synthesized using JQ1-(R). (B) *In vitro* degradation assay using *M. smegmatis* ClpC1P1P2 analyzed after 2 hours incubation showing that BRDT<sub>BD1</sub> not significantly degraded in presence of 100-0.1  $\mu\text{M}$  BacPROTAC-3 distomer, in contrast to the BacPROTAC-3 eutomer (Figure 5B).

80



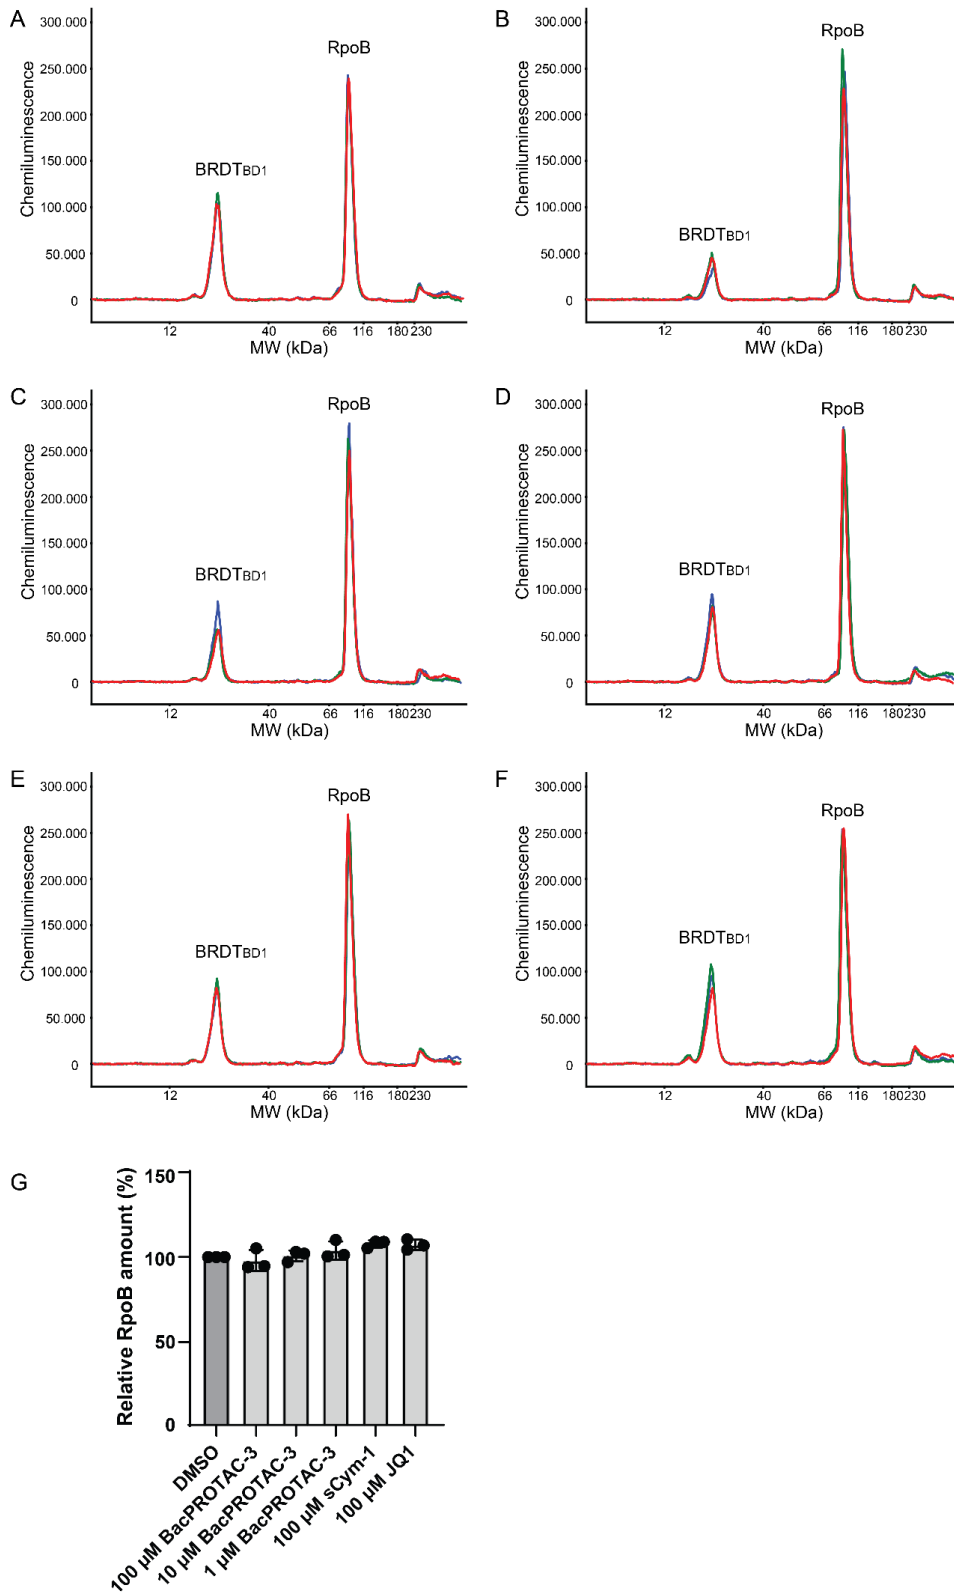

**Figure S7. BRDT<sub>BD1</sub> levels detected by capillary Western blot upon BacPROTAC treatment of *M. smegmatis* cells.**

85

Electropherograms showing intensity of the chemiluminescent signal plotted against the apparent molecular weight detected using anti-BRDT and anti-RpoB antibodies.

(A-F) Detected peaks for lysates of a *M. smegmatis* culture expressing BRDT<sub>BD1</sub> after each treatment (30 minutes) in triplicate: (A) DMSO, (B) 100  $\mu$ M BacPROTAC-3, (C) 10  $\mu$ M BacPROTAC-3, (D) 1  $\mu$ M BacPROTAC-3, (E) 100  $\mu$ M sCym-1, (F) 100  $\mu$ M JQ1. (G) Bar chart showing quantification of detected RpoB peaks (loading control) from three independent experiments normalized to DMSO treatment (dark grey bar) and plotted as mean  $\pm$  standard deviation. Quantification of the BRDT<sub>BD1</sub> peak is shown in **Figure 5D**.

95

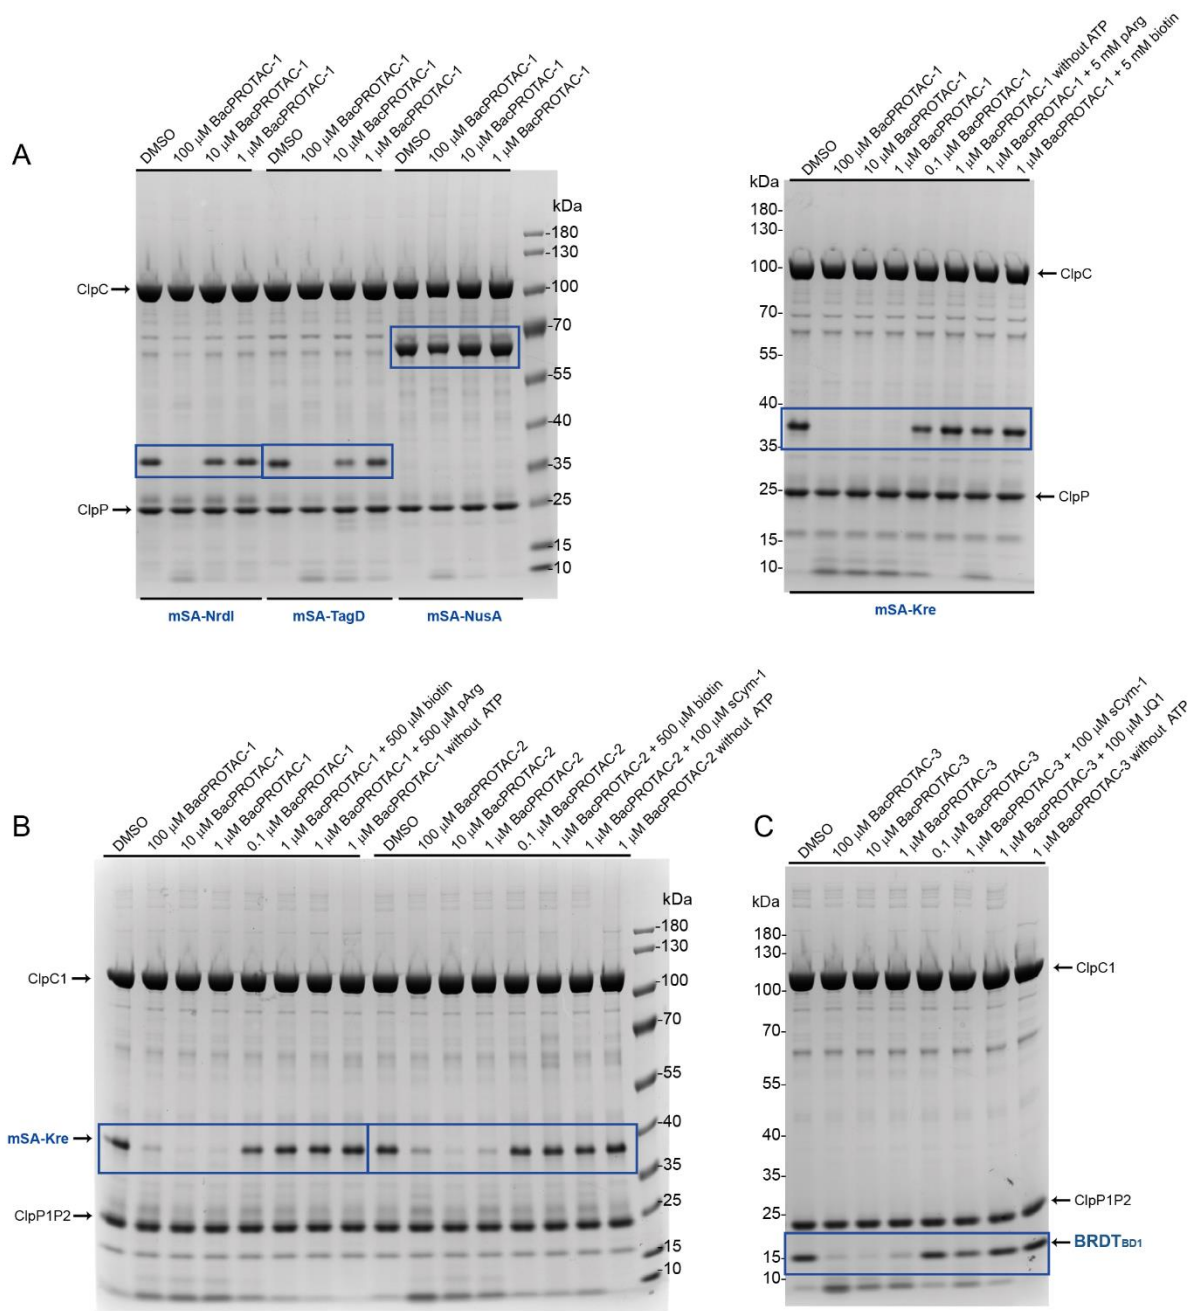

**Figure S8. Uncropped assay gels.** Uncropped Coomassie stained SDS-PAGE gels shown in (A) Figure 1G and 1H; (B) Figure 4B and 4H; (C) Figure 5B.

**Table S1: Crystallographic analysis of ClpC1<sub>NTD</sub>:sCym-1 complex. Data collection and refinement statistics**

|                                                     |                         |
|-----------------------------------------------------|-------------------------|
| PDB ID                                              | 7AA4                    |
| Space group                                         | <i>P1</i>               |
| Cell dimensions                                     |                         |
| <i>a</i> , <i>b</i> , <i>c</i> (Å)                  | 31.35, 33.68, 35.81     |
| $\alpha$ , $\beta$ , $\gamma$ (°)                   | 86.178, 94.216, 103.176 |
| Resolution (Å) <sup>a,b</sup>                       | 25 – 1.68 (1.72 – 1.68) |
| <i>R</i> <sub>meas(I)</sub>                         | 0.062 (0.112)           |
| <i>I</i> / $\sigma$ ( <i>I</i> )                    | 22.6 (12.5)             |
| <i>CC</i> <sub>1/2</sub>                            | 0.998 (0.992)           |
| Completeness (%)                                    | 93.8 (86.5)             |
| Redundancy                                          | 5.8 (5.4)               |
| Resolution (Å)                                      | 25 – 1.68               |
| No. reflections                                     | 15,165                  |
| <i>R</i> <sub>work</sub> / <i>R</i> <sub>free</sub> | 17.0 / 20.3             |
| No. atoms                                           |                         |
| protein                                             | 1254                    |
| ligand                                              | 66                      |
| water                                               | 192                     |
| <i>B</i> factors                                    |                         |
| protein                                             | 11.9                    |
| ligand                                              | 13.5                    |
| water                                               | 23.0                    |

|                   |       |
|-------------------|-------|
| R.m.s. deviations |       |
| Bond lengths (Å)  | 0.006 |
| Bond angles (°)   | 0.789 |

105 <sup>a</sup>Values in parentheses are for highest-resolution shell.

<sup>b</sup>Due to experimental constraints the resolution needed to be truncated to this resolution.

**Table S2. Amino acid sequences of mSA fusion proteins.**

110

| Construct name                                     | Amino acid sequence                                                                                                                                                                                                                                                                                                                      |
|----------------------------------------------------|------------------------------------------------------------------------------------------------------------------------------------------------------------------------------------------------------------------------------------------------------------------------------------------------------------------------------------------|
| mSA                                                | MHHHHHHSSGVDLGTENLYFQSSQDLASAEAGITGTWYNQSGSTFTVTAGAD<br>GNLTGQYENRAQGTGCQNSPYTLTGRYNGTKLEWRVEWNNSTENCHSRTEW<br>RGQYQGGAEARINTQWNLTYEGGSGPATEQGQDTFTKVKPSAASGSGSGSGS<br>GS                                                                                                                                                                |
| mSA-Kre                                            | MHHHHHHSSGVDLGTENLYFQSSQDLASAEAGITGTWYNQSGSTFTVTAGAD<br>GNLTGQYENRAQGTGCQNSPYTLTGRYNGTKLEWRVEWNNSTENCHSRTEW<br>RGQYQGGAEARINTQWNLTYEGGSGPATEQGQDTFTKVKPSAASGSGSGSGS<br>MDDHAYTKDLQPTVENLSKAVYTVNRHAKTAPNPKYLKLLKKRALQKLVKEGKG<br>KKIGLHFSKNPRFSQQQSDVLISIGDYFFHMPPTKEDFEHLPHLGLTNQSYRNP<br>KAQMSLTKAKHLLQEYVGMKEKPLVPCRQPAYHKPVFKKLGESYF |
| mSA-Kre<br>(Cryo-EM<br>structure<br>determination) | MSQDLASAEAGITGTWYNQSGSTFTVTAGADGNLTGQYENRAQGTGCQNSPY<br>TLTGRYNGTKLEWRVEWNNSTENCHSRTEWRGQYQGGAEARINTQWNLTYE<br>GGSGPATEQGQDTFTKVKPSAASGSGSGSGSGSGSGSGSDDHAYTKDLQ<br>PTVENLSKAVYTVNRHAKTAPNPKYLKLLKKRALQKLVKEGKGKKIGLHFSKNP<br>RFSQQQSDVLISIGDYFFHMPPTKEDFEHLPHLGLTNQSYRNPKAQMSLTKAKH<br>LLQEYVGMKEKPLVPCRQPAYHKPVFK KLGESYFHMMMMH        |
| mSA-NrdI                                           | MHHHHHHSSGVDLGTENLYFQSSQDLASAEAGITGTWYNQSGSTFTVTAGAD<br>GNLTGQYENRAQGTGCQNSPYTLTGRYNGTKLEWRVEWNNSTENCHSRTEW<br>RGQYQGGAEARINTQWNLTYEGGSGPATEQGQDTFTKVKPSAASGSGSGSGS<br>GSVVQIIFDSKTGNVQRFVNKTGFQQRKVDMDHVDTPFVLVYTTNFGQVPA<br>STQSFLEKYAHLGVAASGNKVVWGDNFAKSADTISRQYQVPILHKFELSGTSK<br>DVELFTQEVERVVTKSSAKMDPVK                          |
| mSA-TagD                                           | MHHHHHHSSGVDLGTENLYFQSSQDLASAEAGITGTWYNQSGSTFTVTAGAD<br>GNLTGQYENRAQGTGCQNSPYTLTGRYNGTKLEWRVEWNNSTENCHSRTEW<br>RGQYQGGAEARINTQWNLTYEGGSGPATEQGQDTFTKVKPSAASGSGSGSGS<br>GSMKKVITYGTFDLLHWGHKLLERAKQLGDYLVVAISTDEFNLQKQKAYHSYE<br>HRKLILETIRYVDEVIPEKNWEQKKQDIIDHNIDVFMGDDWEGKDFDLKQCEV<br>VYLPRTREGISTTKIKEEIAGL                          |
| mSA-NusA                                           | MHHHHHHSSGVDLGTENLYFQSSQDLASAEAGITGTWYNQSGSTFTVTAGAD<br>GNLTGQYENRAQGTGCQNSPYTLTGRYNGTKLEWRVEWNNSTENCHSRTEW<br>RGQYQGGAEARINTQWNLTYEGGSGPATEQGQDTFTKVKPSAASGSGSGSGS<br>GSMSELDDALILEKEKGISKEIIIEAIEAALISAYKRNFNQAQNVVDLNRGTGSI<br>RVFARKDVVDEVYDQRLEISIEEAQGIHPEYMGDVVEIEVTPKDFGRIAAQTAK                                                 |

|                                                                                                                                                                                                                                                                                    |
|------------------------------------------------------------------------------------------------------------------------------------------------------------------------------------------------------------------------------------------------------------------------------------|
| QVVTQRVREAERGVYSEFIDREEDIMTGIVQRLDNKFIYVSLGKIEALLPVNEQM<br>PNESYKPHDRIKVYITKVEKTTKGPQIYVSRTHPGLLKRLFEIEVPEIYDGTVELKS<br>VAREAGDRSKISVRTDDPDVDPVGSVGPQKQRVQAIVNELKGEKIDIVNWSSD<br>PVEFVANALSPSKVLDVIVNEEEKATTVIVPDYQLSLAIGKRGQNARLAAKLTGW<br>KIDIKSETDARELGIYPRELEEDDEPLFTEPETAESDE |
|------------------------------------------------------------------------------------------------------------------------------------------------------------------------------------------------------------------------------------------------------------------------------------|

**Movie S1. Cryo-EM structure of activated ClpC in complex with substrate.**

115 The movie shows the map of the tetramer of ClpC hexamers (10 Å) and the map obtained refining a single ClpC hexamer (3.7 Å). Both maps are colored by ClpC protomer. Continuous density is observed for a substrate peptide (colored yellow) along the ClpC channel, surrounded by Tyr-containing pore loops, as described in the main text.



120 **REFERENCES**

- Cotruvo, J.A., Jr., and Stubbe, J. (2010). An active dimanganese(III)-tyrosyl radical cofactor in Escherichia coli class Ib ribonucleotide reductase. *Biochemistry* *49*, 1297-1309.
- Filippakopoulos, P., Qi, J., Picaud, S., Shen, Y., Smith, W.B., Fedorov, O., Morse, E.M., Keates, T., Hickman, T.T., Felletar, I., *et al.* (2010). Selective inhibition of BET bromodomains. *Nature* *468*, 1067-1073.
- Gamba, P., Jonker, M.J., and Hamoen, L.W. (2015). A Novel Feedback Loop That Controls Bimodal Expression of Genetic Competence. *PLoS Genet* *11*, e1005047.
- Gusarov, I., and Nudler, E. (2001). Control of intrinsic transcription termination by N and NusA: the basic mechanisms. *Cell* *107*, 437-449.
- Hofmann, F.T., Lindemann, C., Salia, H., Adamitzki, P., Karanicolas, J., and Seebeck, F.P. (2011). A phosphoarginine containing peptide as an artificial SH2 ligand. *Chem Commun (Camb)* *47*, 10335-10337.
- Park, Y.S., Sweitzer, T.D., Dixon, J.E., and Kent, C. (1993). Expression, purification, and characterization of CTP:glycerol-3-phosphate cytidylyltransferase from *Bacillus subtilis*. *J Biol Chem* *268*, 16648-16654.
- Prilusky, J., Felder, C.E., Zeev-Ben-Mordehai, T., Rydberg, E.H., Man, O., Beckmann, J.S., Silman, I., and Sussman, J.L. (2005). FoldIndex: a simple tool to predict whether a given protein sequence is intrinsically unfolded. *Bioinformatics* *21*, 3435-3438.

140
